# Supplementary material for: A highly selective colorimetric chemosensor for cyanide and sulfide in aqueous solution: experimental and theoretical studies
Source: Royal Society of Chemistry journal article supplement (doi:10.1039/c6nj01832g), 2016-01-01
Supplement: c6nj01832g1.pdf [file c6nj01832g1.pdf]

## Supporting Information

### **A highly selective colorimetric chemosensor for cyanide and sulfide in aqueous solution: experimental and theoretical studies**

Soo Min Kim,<sup>a</sup> Minjae Kang,<sup>a</sup> Isaac Choi,<sup>a</sup> Jae Jun Lee,<sup>b\*</sup> Cheal Kim<sup>a,b\*</sup>

*<sup>a</sup>Nowon Institute of Education for the Gifted at Seoultech, Seoul National University of Science and Technology, Seoul 139-743, Korea*

*<sup>b</sup>Department of Fine Chemistry and Department of Interdisciplinary Bio IT Materials, Seoul National University of Science and Technology, Seoul 139-743, Korea. Fax: +82-2-973-9149; Tel: +82-2-970-6693; E-mail: [idtwar@gmail.com](mailto:idtwar@gmail.com) and [chealkim@seoultech.ac.kr](mailto:chealkim@seoultech.ac.kr)*

(a)

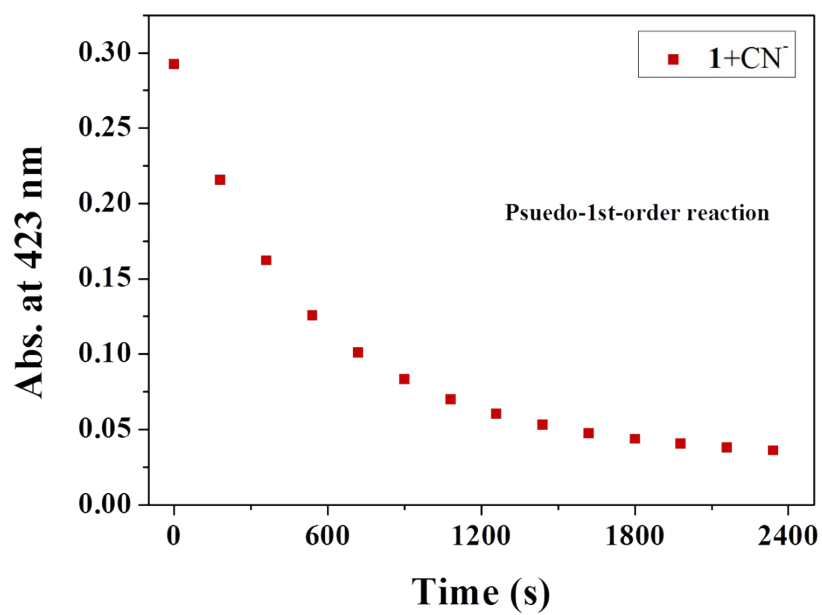

(b)

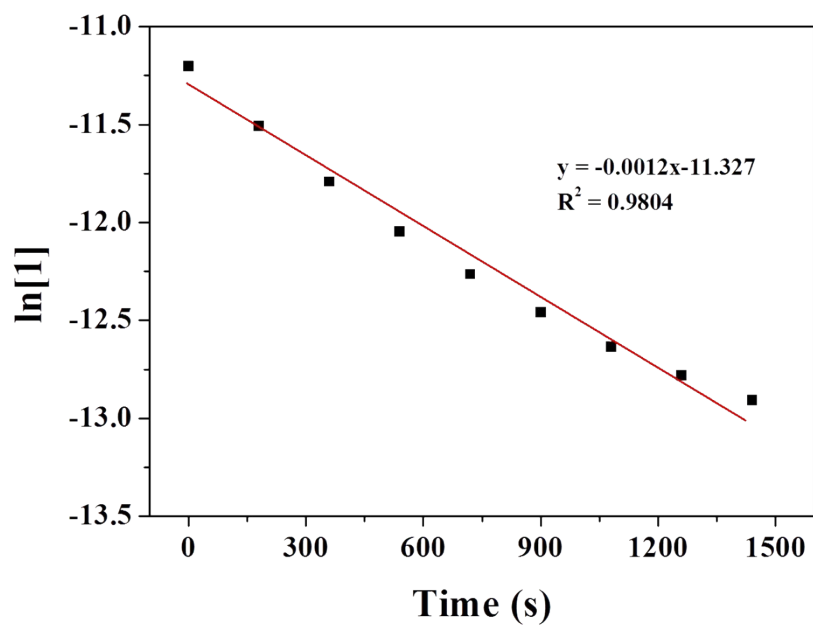

**Fig. S1.** Change of the absorption intensity (423 nm) of **1** (15  $\mu\text{M}$ ) with 45 equiv of  $\text{CN}^-$  under the pseudo-first-order reaction condition. (b) The plot of time vs  $\ln[1]$ .

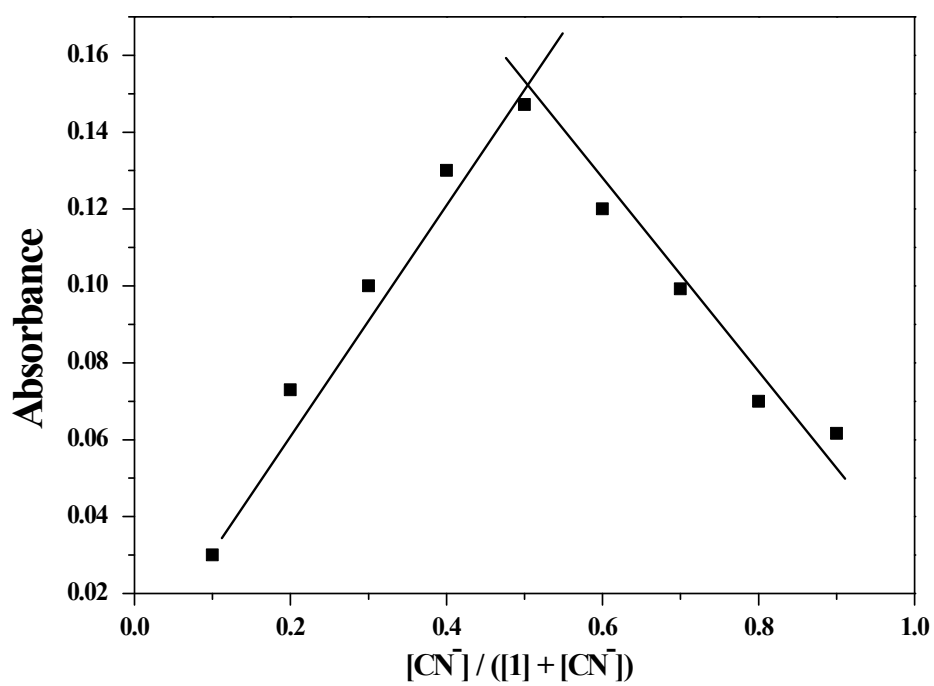

**Fig. S2.** Job plot for the binding of **1** with  $\text{CN}^-$ . Absorbance at 423 nm was plotted as a function of the molar ratio of  $[\text{CN}^-]/([\mathbf{1}] + [\text{CN}^-])$ . The total concentration of  $\text{CN}^-$  ions with receptor **1** was  $1.0 \times 10^{-5}$  M.

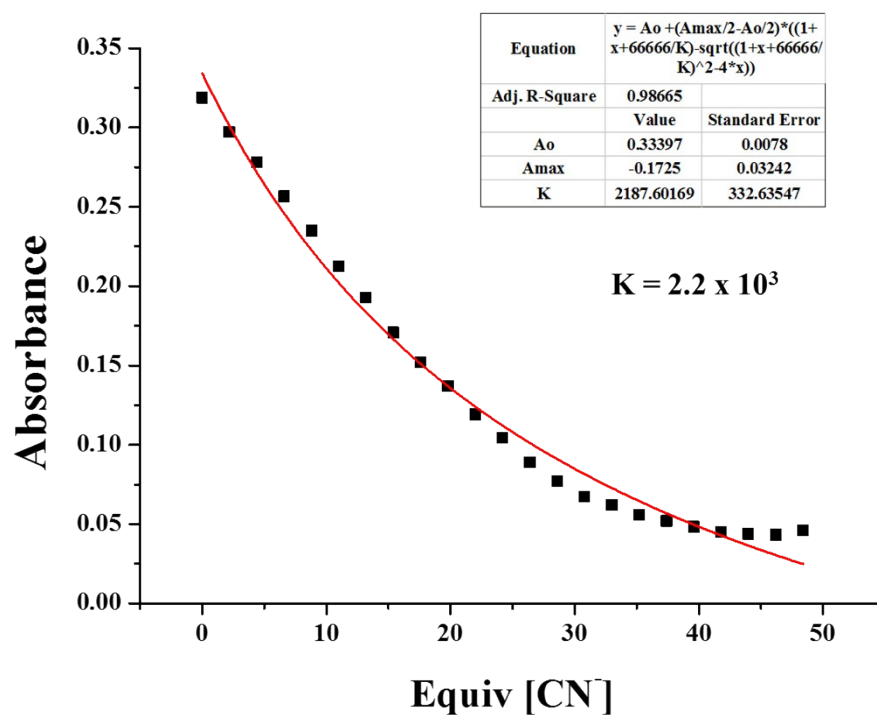

**Fig. S3.** Absorption intensity of **1** (15  $\mu$ M) at 423 nm after addition of increasing concentration of  $\text{CN}^-$ . The red line is the non-linear fitting curve between **1** and  $\text{CN}^-$ . Association constant (K) of **1** with  $\text{CN}^-$  was calculated by the non-linear least square curve fitting using Origin 8.0.

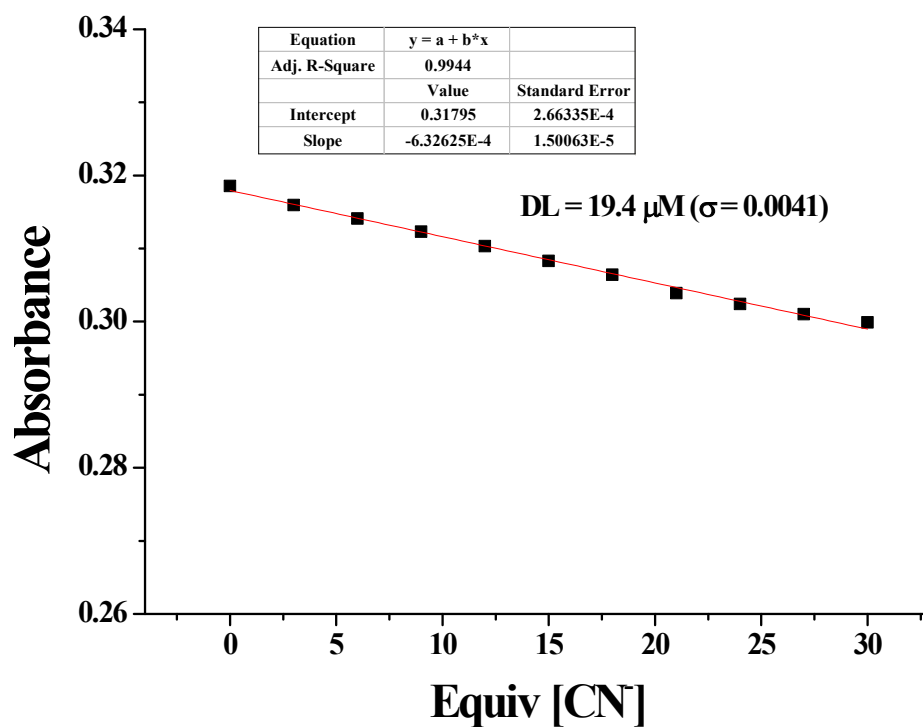

**Fig. S4.** Absorbance (at 423 nm) of **1** as a function of  $\text{CN}^-$  concentration in bis-tris buffer (10 mM bis-tris, pH = 7.0).  $[\mathbf{1}] = 15 \mu\text{mol/L}$  and  $[\text{CN}^-] = 0\text{-}30 \mu\text{mol/L}$ .

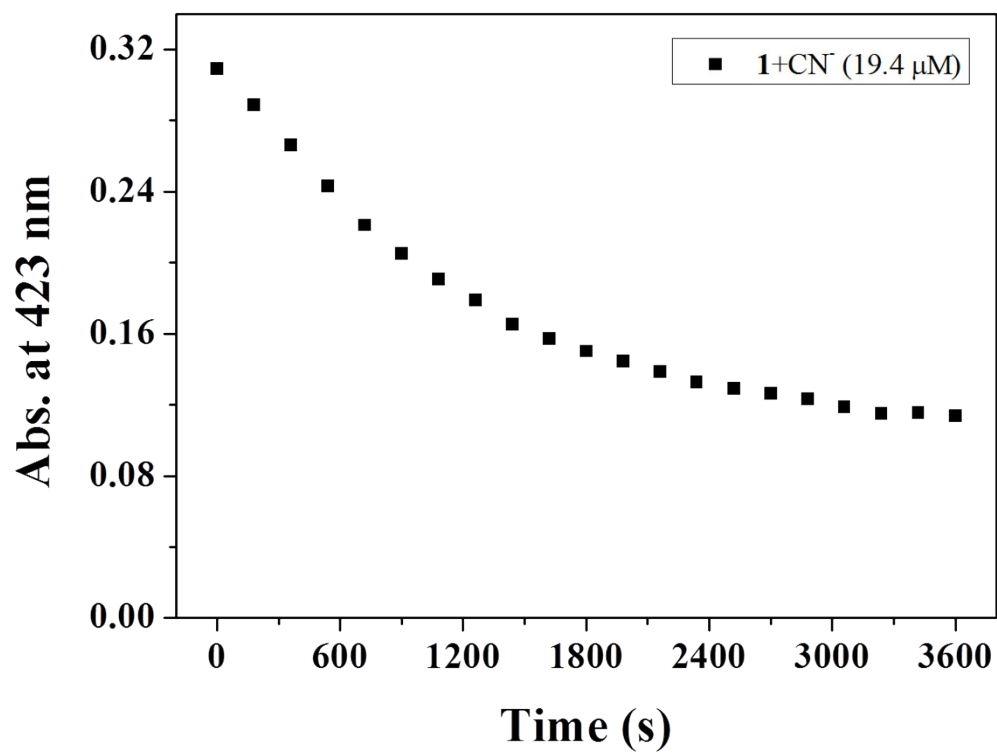

**Fig. S5.** Change of the absorption intensity (423 nm) of **1** (15  $\mu\text{M}$ ) with 19.4  $\mu\text{M}$  of  $\text{CN}^-$  according to time.

(a)

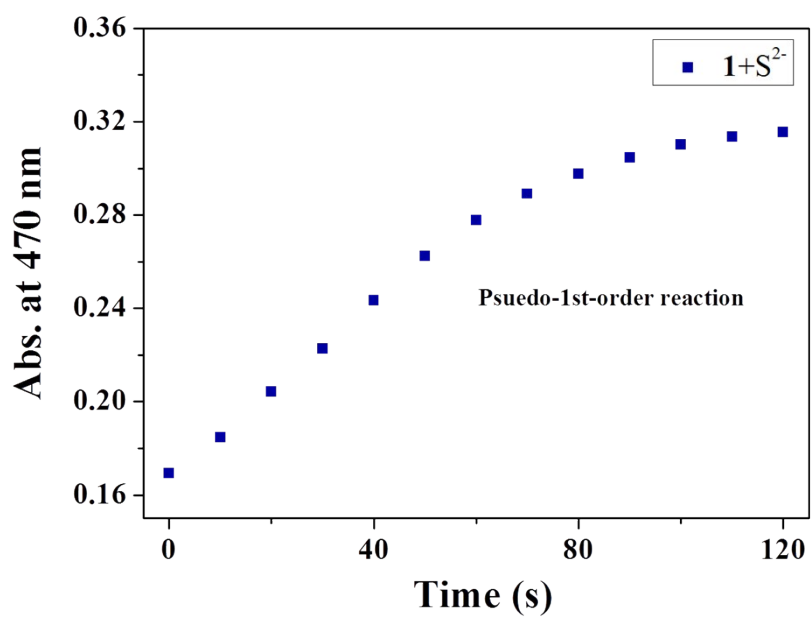

(b)

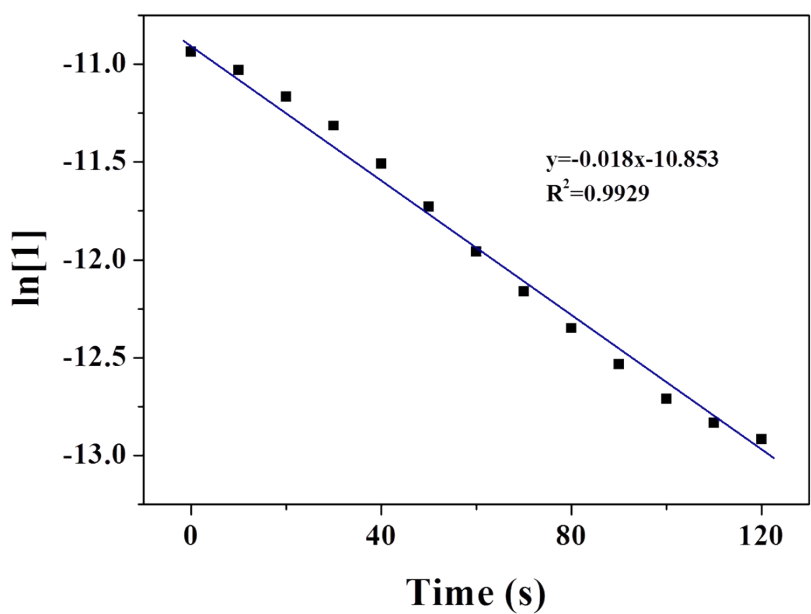

**Fig. S6.** (a) Change of the absorption intensity (470 nm) of **1** (15  $\mu\text{M}$ ) with 45 equiv of  $S^{2-}$  under the pseudo-first-order reaction condition. (b) The plot of time vs  $\ln[1]$ .

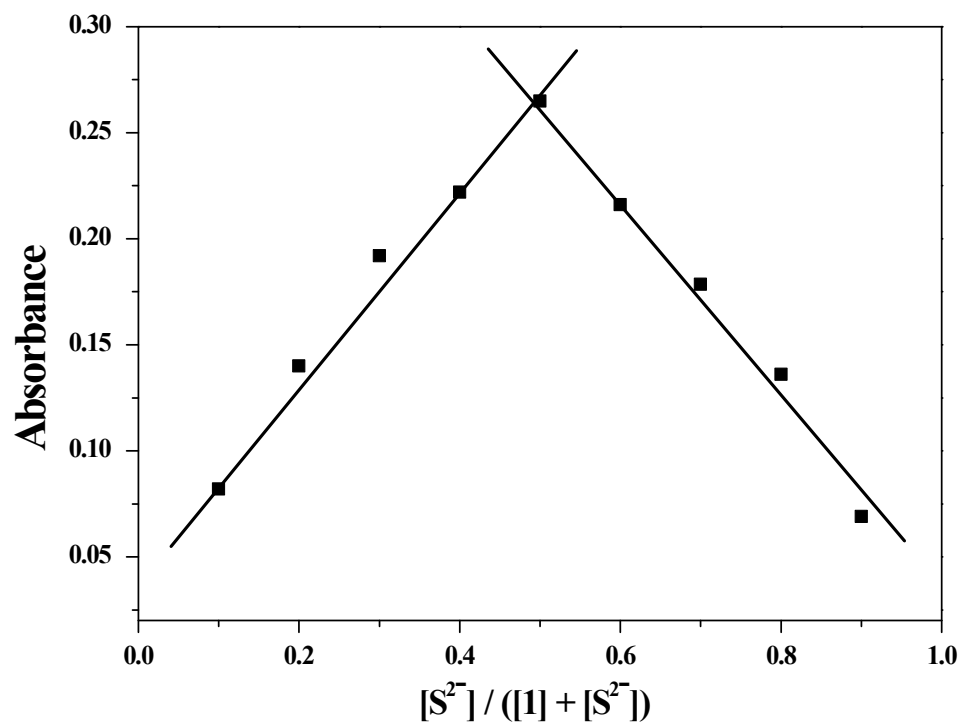

**Fig. S7.** Job plot for the binding of **1** with  $S^{2-}$ . Absorbance at 470 nm was plotted as a function of the molar ratio of  $[S^{2-}]/([1]+[S^{2-}])$ . The total concentration of  $S^{2-}$  ions with receptor **1** was  $1.0 \times 10^{-5}$  M.



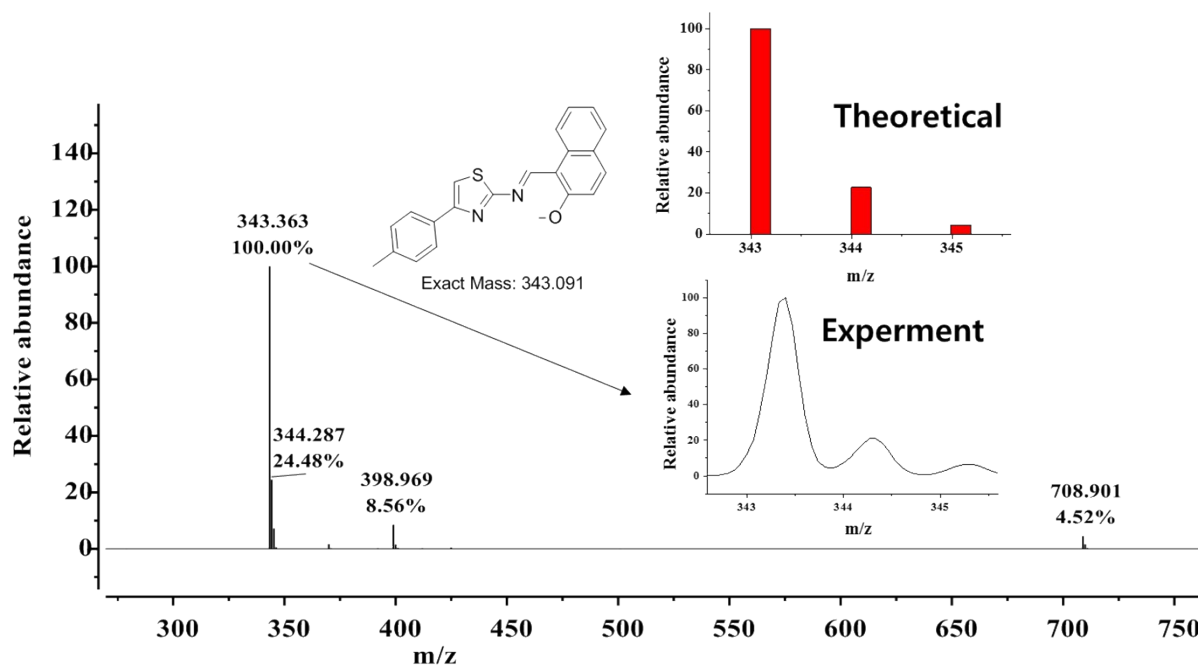

**Fig. S8.** Negative-ion electrospray ionization mass spectrum of **1** (15  $\mu$ M) upon addition of  $\text{Na}_2\text{S}\cdot 9\text{H}_2\text{O}$  (45 equiv).

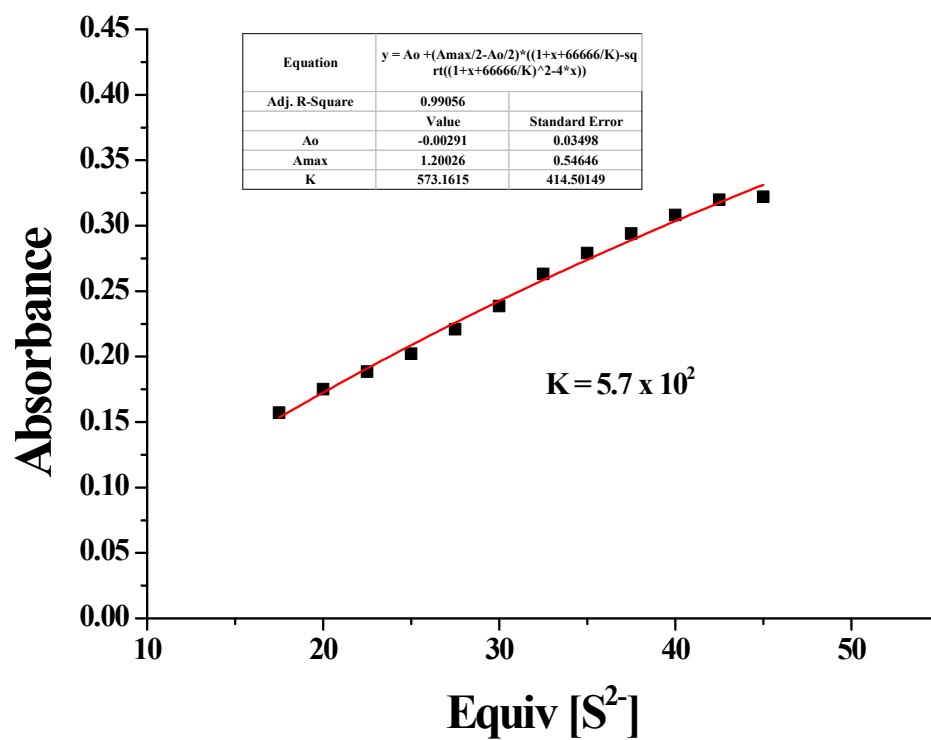

**Fig. S9.** Benesi-Hildebrand plot ( $\lambda_{\text{abs}} = 470 \text{ nm}$ ) of **1** ( $15 \mu\text{M}$ ), assuming a 1:1 stoichiometry for association between **1** and  $\text{S}^{2-}$ .

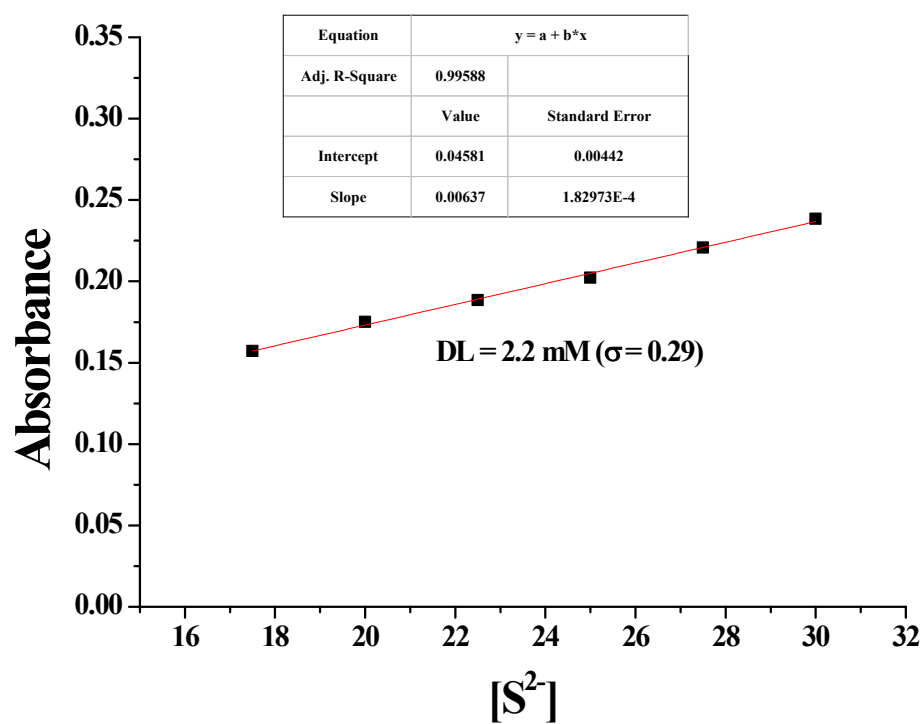

**Fig. S10.** Absorbance (at 470 nm) of **1** as a function of  $S^{2-}$  concentration in bis-tris buffer (10 mM bis-tris, pH = 7.0).  $[1] = 15 \mu\text{mol/L}$  and  $[S^{2-}] = 18\text{-}30 \mu\text{mol/L}$ .

(a)

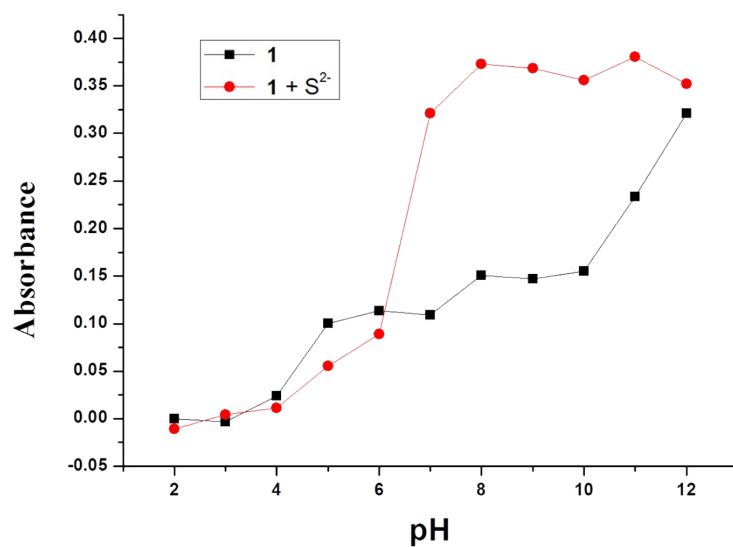

(b)

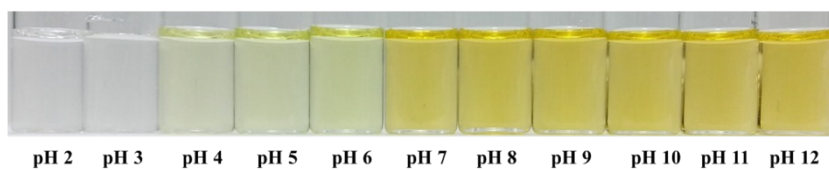

**Fig. S11.** (a) Absorbance (at 470 nm) of **1** (15 μM) with S<sup>2-</sup> (45 equiv) at different pH (2-12).  
(b) The color of **1** (15 μM) with S<sup>2-</sup> (45 equiv) at different pH (2-12).

(a)

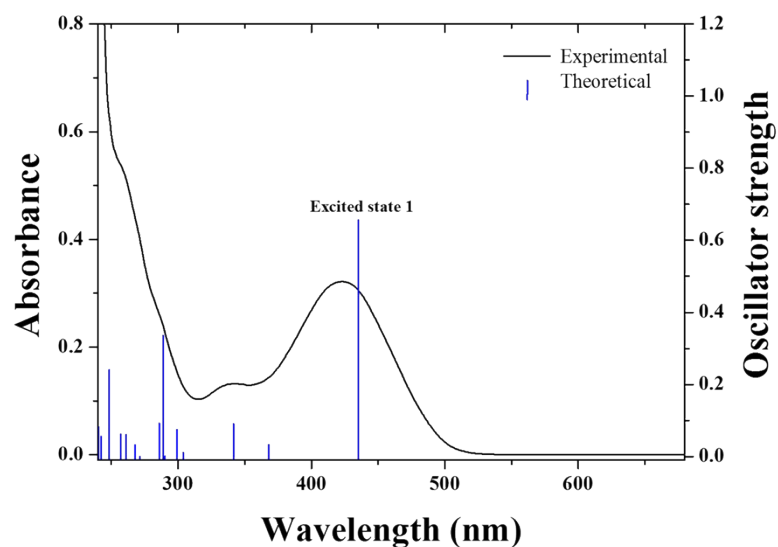

(b)

| Excited State 1 | Wavelength | Percent (%) | Oscillator strength |
|-----------------|------------|-------------|---------------------|
| H → L           | 435.33 nm  | 99 %        | 0.6561              |

(c)

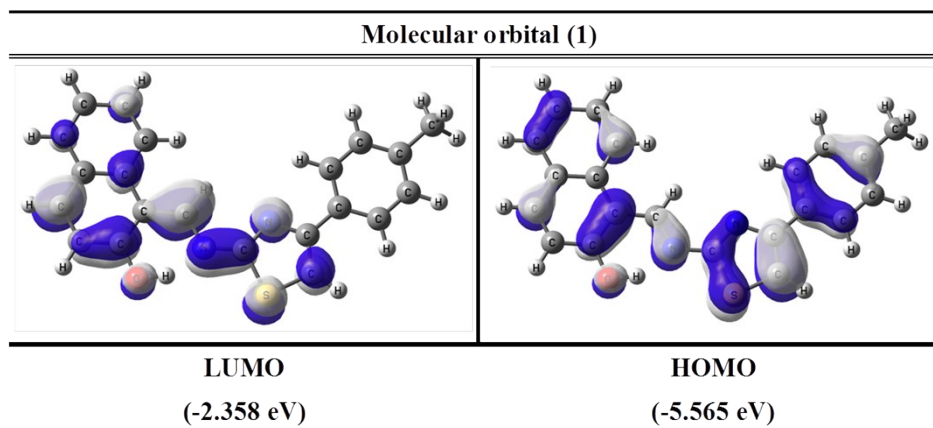

**Fig. S12.** (a) The theoretical excitation energies and the experimental UV-vis spectrum of **1**. (b) The major electronic transition energies and molecular orbital contributions for **1** (H = HOMO and L = LUMO). (c) Isosurface (0.030 electron bohr<sup>-3</sup>) of molecular orbitals participating in the major singlet excited state of **1**.

(a)

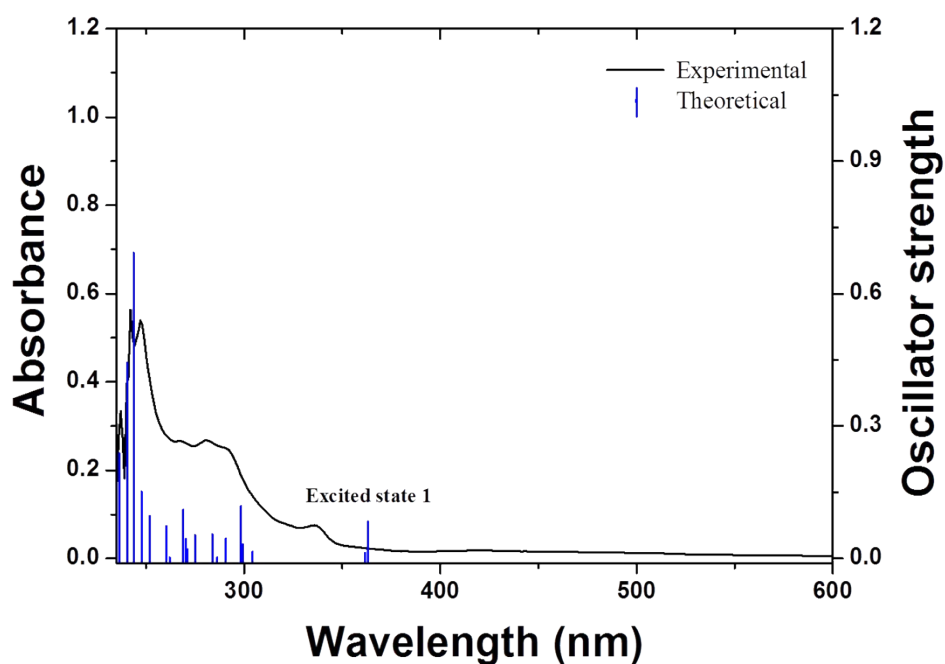

(b)

| Excited State 1 | Wavelength | Percent (%) | Oscillator strength |
|-----------------|------------|-------------|---------------------|
| H → L+1         | 363.19 nm  | 82 %        | 0.0837              |
| H → L           |            | 14 %        |                     |

(c)

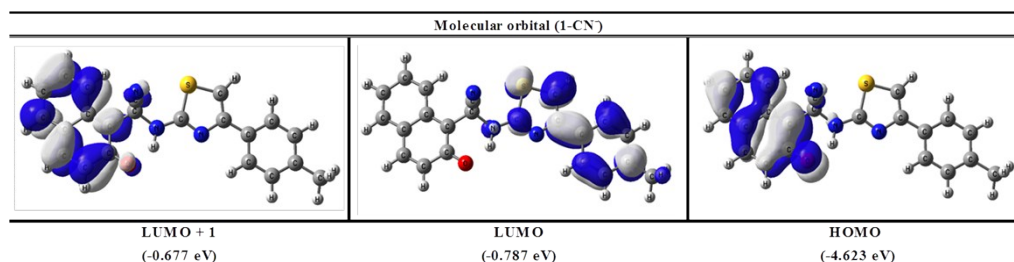

**Fig. S13.** (a) The theoretical excitation energies and the experimental UV-vis spectrum of **1**. (b) The major electronic transition energies and molecular orbital contributions for **1** (H = HOMO and L = LUMO). (c) Isosurface (0.030 electron bohr<sup>-3</sup>) of molecular orbitals participating in the major singlet excited states of **1-CN<sup>-</sup>**.

(a)

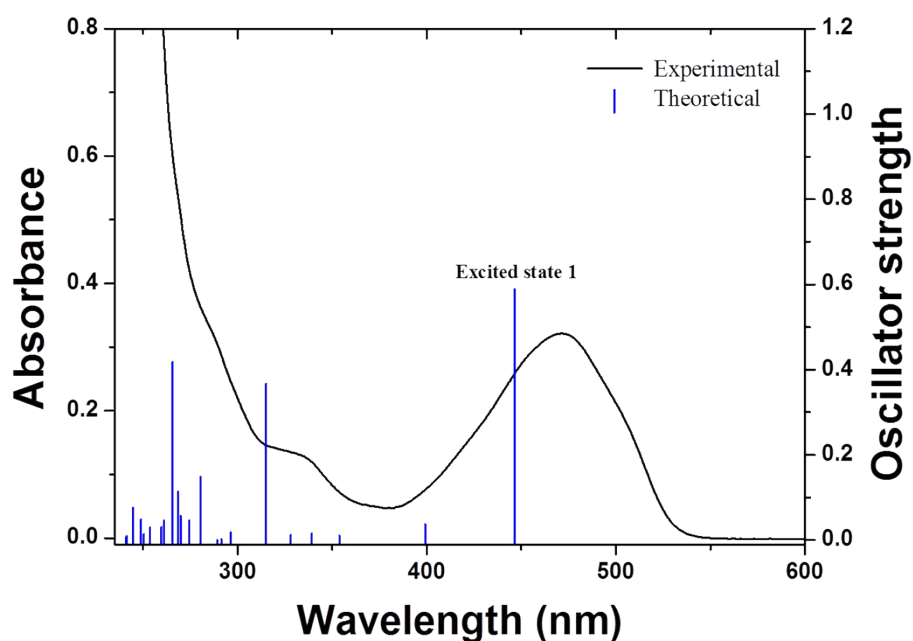

(b)

| Excited State 1 | Wavelength | Percent (%) | Oscillator strength |
|-----------------|------------|-------------|---------------------|
| H → L           | 446.40 nm  | 96 %        | 0.5891              |
| H-2 → L         |            | 2 %         |                     |

(c)

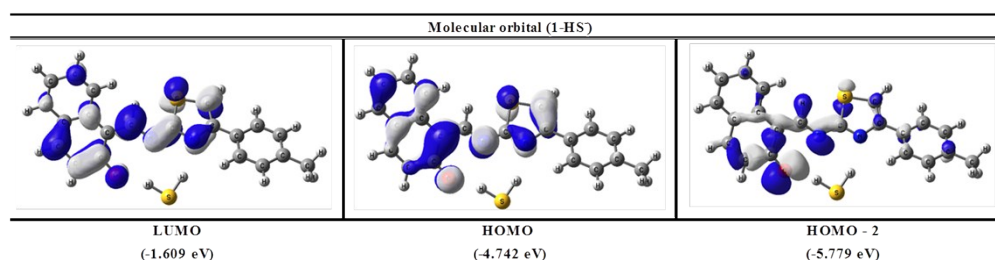

**Fig. S14.** (a) The theoretical excitation energies and the experimental UV-vis spectrum of **1**. (b) The major electronic transition energies and molecular orbital contributions for **1** (H = HOMO and L = LUMO). (c) Isosurface (0.030 electron bohr<sup>-3</sup>) of molecular orbitals participating in the major singlet excited states of **1-CN**.
